# Supplementary material for: Longevity and pleural mesothelioma: age-period-cohort analysis of incidence data from the Surveillance, Epidemiology, and End Results (SEER) Program, 1973–2013
Source: PubMed Central journal article supplement (PMC5966894; doi:10.1186/s13104-018-3436-0), 2018-05-23
Supplement: 13104_2018_3436_MOESM2_ESM.pdf [file 13104_2018_3436_MOESM2_ESM.pdf]

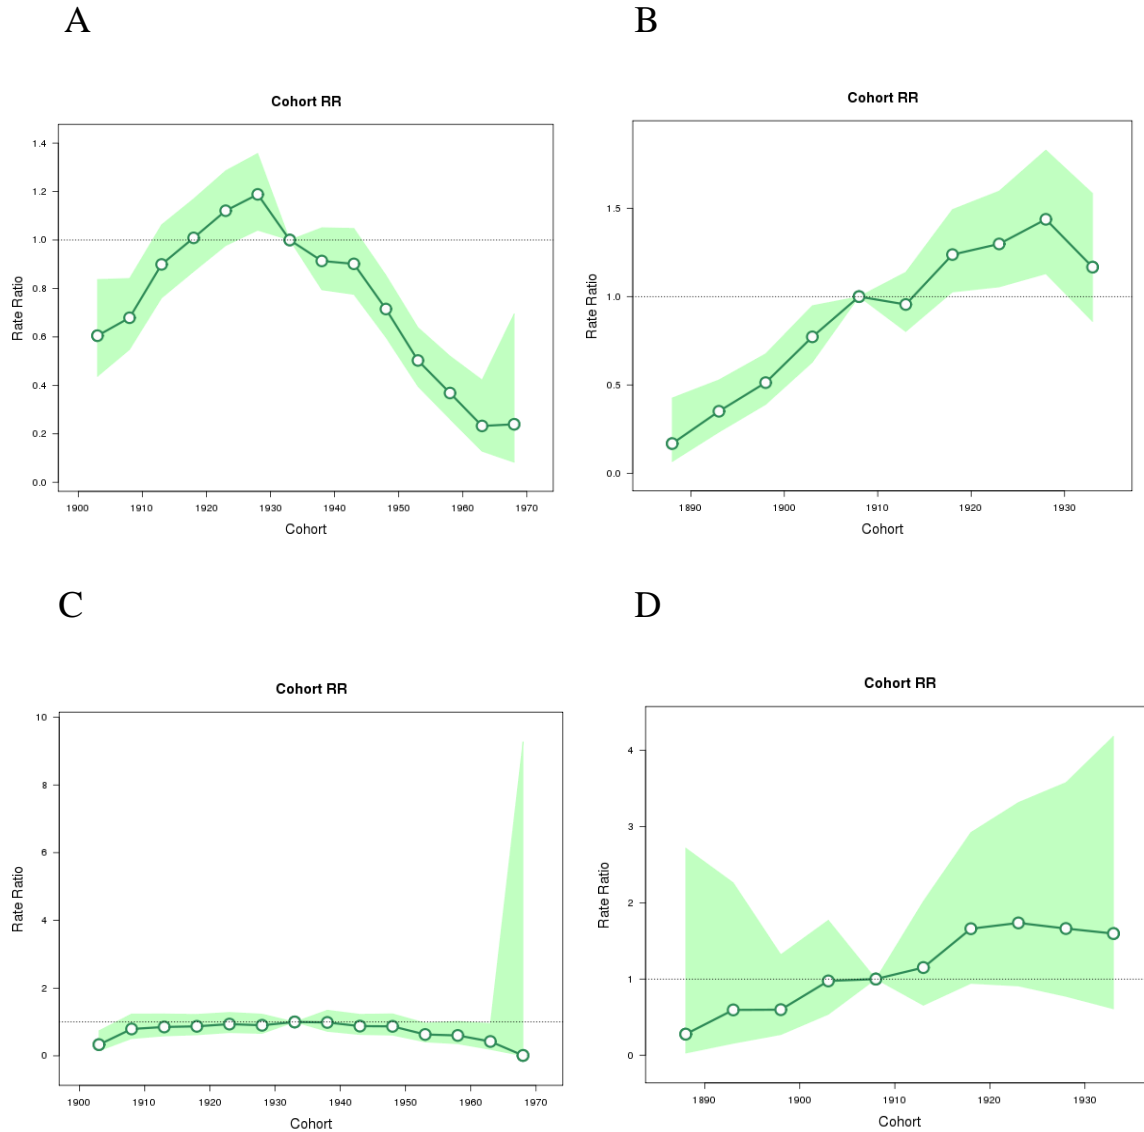

**Supplemental Figure S-2. Cohort effect after adjustment for period effects on PM incidence in SEER 9 registries (1973-2013) in males age 0-74 (Panel A), males age 75+ (Panel B), females age 0-74 (Panel C) and females age 75+ (Panel D). Rate ratios significantly different from 1.0 were identified for A ( $p < 0.0001$ ), B ( $p < 0.0001$ ), and D ( $p = 0.01$ ), but not for C ( $p = 0.16$ ). Cohort deviations indicate significant non-linearity for A, B, and D, but not for C.**
